# Supplementary material for: Dietary Habits, Fatty Acids and Carotenoid Levels Are Associated with Neovascular Age-Related Macular Degeneration in Chinese
Source: MDPI journal article supplement (doi:10.3390/nu11081720), 2019-07-25
Supplement: s1 [file s1]

# **Dietary habits, fatty acids and carotenoid levels are associated with neovascular age-related macular degeneration in Chinese**

<sup>1,2</sup>Alex LK Ng, <sup>3</sup>Ho Hang Leung<sup>†</sup>, <sup>4</sup>Ryo Kawasaki, <sup>5</sup>Wing-Lau Ho, <sup>5</sup>Loraine LW Chow, <sup>5</sup>Sharon SW Chow, <sup>3</sup>Jetty Chung-Yung Lee<sup>\*</sup>, <sup>1, 6</sup>Ian YH Wong<sup>++</sup>

<sup>\*</sup>Corresponding author

<sup>†</sup>Co-first author

<sup>++</sup>Co-corresponding author

<sup>1</sup> Department of Ophthalmology, LKS Faculty of Medicine, The University of Hong Kong, Sassoon Road, Hong Kong SAR;

<sup>2</sup> Hong Kong Ophthalmic Associate, Queen's Road, Hong Kong SAR;

<sup>3</sup> School of Biological Sciences, The University of Hong Kong, Pokfulam Road, Hong Kong SAR;

<sup>4</sup> Department of Vision Informatics, Osaka University, 2-2 Yamadaoka, 565-0871 Osaka, Japan;

<sup>5</sup> Grantham Hospital, Hospital Authority, Wong Chuk Hang, Hong Kong SAR;

<sup>6</sup> Department of Ophthalmology, Hong Kong Sanatorium and Hospital, Happy Valley, Hong Kong SAR

<sup>\*</sup> Correspondence: jettylee@hku.hk; Tel.: +852 2299 0318 (JCL); +852 2572 0211 (IYW)

<sup>†</sup> The authors contributed equally to this work.

<sup>++</sup> Co-corresponding author

## **Supplementary Materials 1 & 2.**

**Questionnaire on the association between age-related macular degeneration and dietary habits**

|                    |                                                            |                          |                   |
|--------------------|------------------------------------------------------------|--------------------------|-------------------|
| Date               |                                                            | Height                   | cm                |
| Age                |                                                            | Weight                   | kg                |
| Sex                | M / F                                                      | Body Mass Index<br>(BMI) | kg/m <sup>2</sup> |
| Education<br>Level | Primary / Secondary / Tertiary<br>or Above / Not Educated* | Occupation               |                   |

\*Please circle the applicable option

**1. Are you taking any vitamin or nutritional supplements? (e.g. fish liver oil capsules, calcium tablets)**

① ☐ Yes, please specify : \_\_\_\_\_

② ☐ No

**2. Do you have past or present smoking habits?**

① ☐ Yes (please answer questions 3 and 4)

② ☐ No (please answer question 5)

**3. How long is your past or current smoking duration in years?** \_\_\_\_\_ years

**4. How many cigarettes did or do you smoke daily in your past or current smoking habits?**

\_\_\_\_\_

**5. How is your drinking habit now (including any kinds of alcohol, such as red wine, baijiu/white wine), brandy, whisky, rum, gin, beer, rice wine, cider and sake)?**

① ☐ Never drink alcohol

② ☐ Once a week (please answer questions 6 and 7)

③ ☐ 2-3 times a week (please answer questions 6 and 7)

④ ☐ 4-5 times a week (please answer questions 6 and 7)

⑤ ☐ 6 times or above a week (please answer questions 6 and 7)

**6.1 How much do you drink every time?** \_\_\_\_\_ Milliliter (mL)

**6.2. What kind of alcohol do you drink?** Red wine / white wine / brandy / whisky / rum / gin / beer / rice baijiu / cider / sake / others, please specify: \_\_\_\_\_

*Please tick (✓) the box for appropriate answer(s)*

**7. Could you tell me which of the following best describes your current dietary habits?**

① ☐ I am a vegetarian

② ☐ I am on special diet because of diabetes / renal diseases

③ ☐ I am on special diet (e.g. nut or gluten free) because of \_\_\_\_\_

④ ☐ No special diet, I eat almost everything

⑤ ☐ No special diet, but I tend to eat more meats, less vegetables and fruits

⑥ ☐ No special diet, but I tend to eat more vegetables and fruits, and less meats

**8. Please rate your preference with each of the following food?**

|                             | 1<br>never eat           | 2<br>occasionally        | 3<br>often consume       | 4<br>always consume      |
|-----------------------------|--------------------------|--------------------------|--------------------------|--------------------------|
| 8a. Western bakery products | <input type="checkbox"/> | <input type="checkbox"/> | <input type="checkbox"/> | <input type="checkbox"/> |
| 8b. Milk                    | <input type="checkbox"/> | <input type="checkbox"/> | <input type="checkbox"/> | <input type="checkbox"/> |
| 8c. Yogurt                  | <input type="checkbox"/> | <input type="checkbox"/> | <input type="checkbox"/> | <input type="checkbox"/> |
| 8d. Cheese                  | <input type="checkbox"/> | <input type="checkbox"/> | <input type="checkbox"/> | <input type="checkbox"/> |
| 8e. Tofu                    | <input type="checkbox"/> | <input type="checkbox"/> | <input type="checkbox"/> | <input type="checkbox"/> |
| 8f. Fried tofu              | <input type="checkbox"/> | <input type="checkbox"/> | <input type="checkbox"/> | <input type="checkbox"/> |
| 8g. Tofu sheet              | <input type="checkbox"/> | <input type="checkbox"/> | <input type="checkbox"/> | <input type="checkbox"/> |
| 8h. Soy drinks              | <input type="checkbox"/> | <input type="checkbox"/> | <input type="checkbox"/> | <input type="checkbox"/> |
| 8i. Preserved vegetables    | <input type="checkbox"/> | <input type="checkbox"/> | <input type="checkbox"/> | <input type="checkbox"/> |
| 8j. Preserved meat          | <input type="checkbox"/> | <input type="checkbox"/> | <input type="checkbox"/> | <input type="checkbox"/> |
| 8k. Nuts                    | <input type="checkbox"/> | <input type="checkbox"/> | <input type="checkbox"/> | <input type="checkbox"/> |
| 8l. Green tea               | <input type="checkbox"/> | <input type="checkbox"/> | <input type="checkbox"/> | <input type="checkbox"/> |
| 8m. Black tea               | <input type="checkbox"/> | <input type="checkbox"/> | <input type="checkbox"/> | <input type="checkbox"/> |

**9. Could you remember the changes of your intake for the following food over the past one year?**

|                            | 1<br>Less than before    | 2<br>Almost no change    | 3<br>Slightly more than before | 4<br>A lot more than before |
|----------------------------|--------------------------|--------------------------|--------------------------------|-----------------------------|
| 9a. Meat                   | <input type="checkbox"/> | <input type="checkbox"/> | <input type="checkbox"/>       | <input type="checkbox"/>    |
| 9b. Seafood<br>(e.g. fish) | <input type="checkbox"/> | <input type="checkbox"/> | <input type="checkbox"/>       | <input type="checkbox"/>    |
| 9c. Vegetables             | <input type="checkbox"/> | <input type="checkbox"/> | <input type="checkbox"/>       | <input type="checkbox"/>    |
| 9d. Fruits                 | <input type="checkbox"/> | <input type="checkbox"/> | <input type="checkbox"/>       | <input type="checkbox"/>    |

**10. Could you tell me how you usually cook your food? *Maximum 2 answers for each food group.***

|                     | 1<br>Steam               | 2<br>Stir fry            | 3<br>Fry                 | 4<br>Grill               | 5<br>Stew                | 6<br>Boil                | 7<br>Never eat           |
|---------------------|--------------------------|--------------------------|--------------------------|--------------------------|--------------------------|--------------------------|--------------------------|
| 10a. Vegetables     | <input type="checkbox"/> | <input type="checkbox"/> | <input type="checkbox"/> | <input type="checkbox"/> | <input type="checkbox"/> | <input type="checkbox"/> | <input type="checkbox"/> |
| 10b. Meat           | <input type="checkbox"/> | <input type="checkbox"/> | <input type="checkbox"/> | <input type="checkbox"/> | <input type="checkbox"/> | <input type="checkbox"/> | <input type="checkbox"/> |
| 10c. Sea/river food | <input type="checkbox"/> | <input type="checkbox"/> | <input type="checkbox"/> | <input type="checkbox"/> | <input type="checkbox"/> | <input type="checkbox"/> | <input type="checkbox"/> |

**11. Could you tell me which of the following best describe your taste preference?**

- |                                       |                                  |
|---------------------------------------|----------------------------------|
| ① <input type="checkbox"/> Very salty | ② <input type="checkbox"/> Salty |
| ③ <input type="checkbox"/> Median     | ④ <input type="checkbox"/> Bland |
| ⑤ <input type="checkbox"/> Very bland |                                  |

**12. Could you tell me which of the following best describe your taste preference?**

- |                                       |                                  |
|---------------------------------------|----------------------------------|
| ① <input type="checkbox"/> Very sweet | ② <input type="checkbox"/> Sweet |
| ③ <input type="checkbox"/> Median     | ④ <input type="checkbox"/> Bland |
| ⑤ <input type="checkbox"/> Very bland |                                  |

**13. Could you tell me which of the following best describe your preference of oily food?**

- |                                       |                                  |
|---------------------------------------|----------------------------------|
| ① <input type="checkbox"/> Very oily  | ② <input type="checkbox"/> oily  |
| ③ <input type="checkbox"/> Median     | ④ <input type="checkbox"/> bland |
| ⑤ <input type="checkbox"/> Very bland |                                  |

**Interviewers READ: I am going to ask you about your diet in the past 7 days. Please think about what you ate in the past 7 days, including those in meals and as snacks.**

**14. Could you tell me which of the following best describe the taste of your food in the past 7 days?**

- |                                                        |                                                   |
|--------------------------------------------------------|---------------------------------------------------|
| ① <input type="checkbox"/> Most of them are very salty | ② <input type="checkbox"/> Most of them are salty |
| ③ <input type="checkbox"/> Most of them are median     | ④ <input type="checkbox"/> Most of them are blank |
| ⑤ <input type="checkbox"/> Most of them are very blank |                                                   |

**15a. In the past 7 days, how often did you eat rice and rice products including cooked rice, congee, rice noodle and Cheung Fan?**

- |                                                           |                                      |                                      |
|-----------------------------------------------------------|--------------------------------------|--------------------------------------|
| ① <input type="checkbox"/> Never                          |                                      |                                      |
| ② <input type="checkbox"/> Did not eat in the past 7 days |                                      |                                      |
| ③ <input type="checkbox"/> 1~2 / week                     | ④ <input type="checkbox"/> 3~4/ week | ⑤ <input type="checkbox"/> 5~6/ week |
| ⑥ <input type="checkbox"/> 1/day                          | ⑦ <input type="checkbox"/> 2/day     | ⑧ <input type="checkbox"/> ≥ 3/ day  |

**15b. Each time you ate rice and rice products, what is your serving size?**

(1 Bowl = 100 g = 2 Liangs) *Please show subjects the sample bowl!*

- |                                     |                                      |                                      |
|-------------------------------------|--------------------------------------|--------------------------------------|
| ① <input type="checkbox"/> < 1 bowl | ② <input type="checkbox"/> 1 bowl    | ③ <input type="checkbox"/> 1.5 bowls |
| ④ <input type="checkbox"/> 2 bowls  | ⑤ <input type="checkbox"/> 2.5 bowls | ⑥ <input type="checkbox"/> ≥ 3 bowls |

**16a. In the past 7 days, how often did you eat wheat noodle (e.g, dan mien, ganmien, chow mien noodles, yi mien, lo mien, udon, wonton noodles, Shanghai noodles, etc)?**

- |                                                           |
|-----------------------------------------------------------|
| ① <input type="checkbox"/> Never                          |
| ② <input type="checkbox"/> Did not eat in the past 7 days |

③ ☐ 1~2 / week

④ ☐ 3~4/ week

⑤ ☐ 5~6/ week

⑥ ☐ 1/day

⑦ ☐ 2/day

⑧ ☐  $\geq 3$ / day

**16b. Each time you ate wheat noodle, what is your serving size?**

(1 Bowl = 100 g = 2 Liangs) *Please show subjects the sample bowl!*

① ☐ < 1 bowl

② ☐ 1 bowl

③ ☐ 1.5 bowls

④ ☐ 2 bowls

⑤ ☐ 2.5 bowls

⑥ ☐  $\geq 3$  bowls

**17a. In the past 7 days, how often did you eat cereal meal?**

① ☐ Never

② ☐ Did not eat in the past 7 days

③ ☐ 1~2 / week

④ ☐ 3~4/ week

⑤ ☐ 5~6/ week

⑥ ☐ 1/day

⑦ ☐ 2/day

⑧ ☐  $\geq 3$ / day

**17b. Each time you ate cereal meal, what is your serving size?**

(1 bowl = 100 g = 2 Liang)

① ☐ < 1 bowl

② ☐ 1 bowl

③ ☐ 1.5 bowls

④ ☐ 2 bowls

⑤ ☐ 2.5 bowls

⑥ ☐  $\geq 3$  bowls

**18a. In the past 7 days, how often did you eat Dim Sum, e.g. Man-Tau, plain roll and barbecue pork bun etc?**

① ☐ Never

② ☐ Did not eat in the past 7 days

③ ☐ 1~2 / week

④ ☐ 3~4/ week

⑤ ☐ 5~6/ week

⑥ ☐ 1/day

⑦ ☐ 2/day

⑧ ☐  $\geq 3$ / day

**18b. Each time you ate Dim Sum, what is your serving size?**

(1 piece of Mann-Tau/plain roll  $\approx$  50g, 1 piece of barbecue pork bun  $\approx$  75 g)

① ☐ < 50g

② ☐ 50g

③ ☐ 50 ~ 75g

④ ☐ 100 ~ 150 g

⑤ ☐  $\geq 200$ g

**19a. In the past 7 days, how often did you eat bread, e.g. pineapple bun, croissant etc?**

① ☐ Never

② ☐ Did not eat in the past 7 days

③ ☐ 1~2 / week

④ ☐ 3~4/ week

⑤ ☐ 5~6/ week

⑥ ☐ 1/day

⑦ ☐ 2/day

⑧ ☐  $\geq 3$ / day

**19b. Each time you ate bread, what is your serving size?**

(1 piece of pineapple bun  $\approx$  75g , 1 piece of bread/Croissant  $\approx$  50 g)

① ☐ < 50g

② ☐ 50g

③ ☐ 50 ~ 75g

④ ☐ 100 ~ 150 g

⑤ ☐  $\geq 200$ g

**20a. In the past 7 days, how often did you eat biscuits and cake?**

- ① ☐ Never  
② ☐ Did not eat in the past 7 days  
③ ☐ 1~2 / week  
④ ☐ 3~4/ week  
⑤ ☐ 5~6/ week  
⑥ ☐ 1/day  
⑦ ☐ 2/day  
⑧ ☐  $\geq 3/$  day

**20b. Each time you ate bread, what is your serving size?**

(1 piece of Tai Ping biscuits  $\approx$  10g , 1 piece of cake  $\approx$  50 g)

- ① ☐  $< 50$ g      ② ☐ 50g      ③ ☐ 50 ~ 75g      ④ ☐ 100 ~ 150 g      ⑤ ☐  $\geq 200$ g

**21a. In the past 7 days, how often did you eat green leafy vegetables (Choi Sum, Pok Choi, Chinese Kale, Broccoli, spinach)?**

- ① ☐ Never  
② ☐ Did not eat in the past 7 days  
③ ☐ 1~2 / week  
④ ☐ 3~4/ week  
⑤ ☐ 5~6/ week  
⑥ ☐ 1/day  
⑦ ☐ 2/day  
⑧ ☐  $\geq 3/$  day

**21b. Each time you ate green leafy vegetables, what is your serving size?**

(1 portion = 50 g = 1 Liang)

- ① ☐  $< 1$  Liang      ② ☐ 1 Liang      ③ ☐ 1.5 Liangs      ④ ☐ 2~3 Liangs      ⑤ ☐  $\geq 4$  Liangs

**22a. In the past 7 days, how often did you eat tomato?**

- ① ☐ Never  
② ☐ Did not eat in the past 7 days  
③ ☐ 1~2 / week  
④ ☐ 3~4/ week  
⑤ ☐ 5~6/ week  
⑥ ☐ 1/day  
⑦ ☐ 2/day  
⑧ ☐  $\geq 3/$  day

**22b. Each time you ate tomato, what is your serving size?**

(1 portion = 50 g = 1 Liang)

- ① ☐  $< 1$  Liang      ② ☐ 1 Liang      ③ ☐ 1.5 Liangs      ④ ☐ 2~3 Liangs      ⑤ ☐  $\geq 4$  Liangs

**23a. In the past 7 days, how often did you eat red carrots?**

- ① ☐ Never  
② ☐ Did not eat in the past 7 days  
③ ☐ 1~2 / week  
④ ☐ 3~4/ week  
⑤ ☐ 5~6/ week  
⑥ ☐ 1/day  
⑦ ☐ 2/day  
⑧ ☐  $\geq 3/$  day

**23b. Each time you ate red carrots, what is your serving size?**

(1 portion = 50 g = 1 Liang)

- ① ☐  $< 1$  Liang      ② ☐ 1 Liang      ③ ☐ 1.5 Liangs      ④ ☐ 2~3 Liangs      ⑤ ☐  $\geq 4$  Liangs

**24a. In the past 7 days, how often did you eat other vegetables? E.g. turnip, celery cabbage, cabbage and potatoes.**

- ① ☐ Never  
② ☐ Did not eat in the past 7 days  
③ ☐ 1~2 / week                      ④ ☐ 3~4/ week                      ⑤ ☐ 5~6/ week  
⑥ ☐ 1/day                              ⑦ ☐ 2/day                              ⑧ ☐  $\geq 3$ / day

**24b. Each time you ate other vegetables, what is your serving size?**

(1 portion = 50 g = 1 Liang)

- ① ☐  $< 1$  Liang              ② ☐ 1 Liang              ③ ☐ 1.5 Liangs              ④ ☐ 2~3 Liangs              ⑤ ☐  $\geq 4$  Liangs

**25a. In the past 7 days, how often did you eat tofu?**

- ① ☐ Never  
② ☐ Did not eat in the past 7 days  
③ ☐ 1~2 / week                      ④ ☐ 3~4/ week                      ⑤ ☐ 5~6/ week  
⑥ ☐ 1/day                              ⑦ ☐ 2/day                              ⑧ ☐  $\geq 3$ / day

**25b. Each time you ate tofu, what is your serving size?**

(1 portion = 50 g = 1 Liang)

- ① ☐  $< 1$  Liang              ② ☐ 1 Liang              ③ ☐ 1.5 Liangs              ④ ☐ 2~3 Liangs              ⑤ ☐  $\geq 4$  Liangs

**26a. In the past 7 days, how often did you eat mushrooms/wood fungi?**

- ① ☐ Never  
② ☐ Did not eat in the past 7 days  
③ ☐ 1~2 / week                      ④ ☐ 3~4/ week                      ⑤ ☐ 5~6/ week  
⑥ ☐ 1/day                              ⑦ ☐ 2/day                              ⑧ ☐  $\geq 3$ / day

**26b. Each time you ate mushrooms/wood fungi, what is your serving size?**

(1 portion = 50 g = 1 Liang)

- 1 ☐  $< 1$  Liang              2 ☐ 1 Liang              3 ☐ 1.5 Liangs              4 ☐ 2~3 Liangs              5 ☐  $\geq 4$  Liangs

**27. When you eat meat, do you remove fat/skin on the meat, or would you:**

- ① ☐ Eat all                              ② ☐ Remove some of the fat/skin before eating  
③ ☐ Remove all the fat/skin before eating                      ④ ☐ Do not eat fatty meat

**28a. In the past 7 days, how often did you eat red meat including pork, beef and lamb?**

- ① ☐ Never  
② ☐ Did not eat in the past 7 days  
③ ☐ 1~2 / week                      ④ ☐ 3~4/ week                      ⑤ ☐ 5~6/ week  
⑥ ☐ 1/day                              ⑦ ☐ 2/day                              ⑧ ☐  $\geq 3$ / day

**28b. Each time you ate red meat, what is your serving size?**

(1 portion = 50 g = 1 Liang)

- ① ☐ < 1 Liang                      ② ☐ 1 Liang                      ③ ☐ 2 ~ 3 Liangs                      ④ ☐ ≥ 4 Liangs

**29a. In the past 7 days, how often did you eat poultry? This include all poultries—roasted duck, steamed/boiled chicken and stewed pigeons etc.**

- ① ☐ Never  
② ☐ Did not eat in the past 7 days  
③ ☐ 1~2 / week                      ④ ☐ 3~4/ week                      ⑤ ☐ 5~6/ week  
⑥ ☐ 1/day                      ⑦ ☐ 2/day                      ⑧ ☐ ≥ 3/ day

**29b. Each time you ate poultry, what is your serving size?**

(1 portion = 50 g = 1 Liang)

- ① ☐ < 1 Liang                      ② ☐ 1 Liang                      ③ ☐ 2 ~ 3 Liangs                      ④ ☐ ≥ 4 Liangs

**30a. In the past 7 days, how often did you eat oily fish such as mackerel, eel, woo fish, salmon and sardine? DO NOT COUNT salted fish!**

- ① ☐ Never  
② ☐ Did not eat in the past 7 days  
③ ☐ 1~2 / week                      ④ ☐ 3~4/ week                      ⑤ ☐ 5~6/ week  
⑥ ☐ 1/day                      ⑦ ☐ 2/day                      ⑧ ☐ ≥ 3/ day

**30b. Each time you ate oily fish, what is your serving size?**

(1 portion = 50 g = 1 Liang)

- ① ☐ < 1 Liang                      ② ☐ 1 Liang                      ③ ☐ 2 ~ 3 Liangs                      ④ ☐ ≥ 4 Liangs

**31a. In the past 7 days, how often did you eat other fish such as grass fish, big head fish, blace and golden thread fish? DO NOT COUNT salted fish!**

- ① ☐ Never  
② ☐ Did not eat in the past 7 days  
③ ☐ 1~2 / week                      ④ ☐ 3~4/ week                      ⑤ ☐ 5~6/ week  
⑥ ☐ 1/day                      ⑦ ☐ 2/day                      ⑧ ☐ ≥ 3/ day

**31b. Each time you ate those fish, what is your serving size?**

(1 portion = 50 g = 1 Liang)

- ① ☐ < 1 Liang                      ② ☐ 1 Liang                      ③ ☐ 2 ~ 3 Liangs                      ④ ☐ ≥ 4 Liangs

**32a. In the past 7 days, how often did you eat other seafood such as prawn, shrimp, crab, mussels, scallop?**

- ① ☐ Never



② ☐ Did not eat in the past 7 days

③ ☐ 1~2 / week

④ ☐ 3~4/ week

⑤ ☐ 5~6/ week

⑥ ☐ 1/day

⑦ ☐ 2/day

⑧ ☐  $\geq 3$ / day

**32b. Each time you ate these seafood, what is your serving size?**

(1 portion = 50 g = 1 Liang)

① ☐  $< 1$  Liang

② ☐ 1 Liang

③ ☐ 2 ~ 3 Liangs

④ ☐  $\geq 4$  Liangs

**33. How many eggs did you eat in past 7 days? Does this include preserved egg?**

① ☐ Never

② ☐  $< 1$ / week

③ ☐ 1~2/ week

④ ☐ 3~4/ week

⑤ ☐ 1/day

⑥ ☐ 2/day

⑦ ☐  $\geq 3$ / day

**34a. In the past 7 days, how often did you eat preserved/cured meat?**

① ☐ Never

② ☐ Did not eat in the past 7 days

③ ☐ 1~2 / week

④ ☐ 3~4/ week

⑤ ☐ 5~6/ week

⑥ ☐ 1/day

⑦ ☐ 2/day

⑧ ☐  $\geq 3$ / day

**34b. Each time you ate preserved/cured meat, what is your serving size?**

(1 portion = 50 g = 1 Liang)

① ☐  $< 1$  Liang

② ☐ 1 Liang

③ ☐ 2 ~ 3 Liangs

④ ☐  $\geq 4$  Liangs

**35a. In the past 7 days, how often did you eat salted fish?**

① ☐ Never

② ☐ Did not eat in the past 7 days

③ ☐ 1~2 / week

④ ☐ 3~4/ week

⑤ ☐ 5~6/ week

⑥ ☐ 1/day

⑦ ☐ 2/day

⑧ ☐  $\geq 3$ / day

**35b. Each time you ate salted fish, what is your serving size?**

(1 portion = 50 g = 1 Liang)

① ☐  $< 1$  Liang

② ☐ 1 Liang

③ ☐ 2 ~ 3 Liangs

④ ☐  $\geq 4$  Liangs

**36a. In the past 7 days, how often did you eat pickled vegetables?**

① ☐ Never

② ☐ Did not eat in the past 7 days

③ ☐ 1~2 / week

④ ☐ 3~4/ week

⑤ ☐ 5~6/ week

⑥ ☐ 1/day

⑦ ☐ 2/day

⑧ ☐  $\geq 3$ / day

**36b. Each time you ate pickled vegetables, what is your serving size?**

(1 portion = 50 g = 1 Liang)

1 ☐ < 1 Liang

2 ☐ 1 Liang

3 ☐ 1.5 Liangs

4 ☐ 2~3 Liangs

5 ☐ ≥ 4 Liangs

**37a. In the past 7 days, how often did you eat citrus fruit e.g. orange and lemon?**

① ☐ Never

② ☐ Did not eat in the past 7 days

③ ☐ 1~2 / week

④ ☐ 3~4/ week

⑤ ☐ 5~6/ week

⑥ ☐ 1/day

⑦ ☐ 2/day

⑧ ☐ ≥ 3/ day

**37b. Each time you ate citrus fruit, what is your serving size?**

(1 piece of orange ≈ 3 Liangs = 150 g)

① ☐ < 1 piece

② ☐ 1 piece

③ ☐ 2 ~ 3 pieces

④ ☐ ≥ 4 pieces

**38a. In the past 7 days, how often did you eat other fruit e.g. apple, pear and Lychee?**

① ☐ Never

② ☐ Did not eat in the past 7 days

③ ☐ 1~2 / week

④ ☐ 3~4/ week

⑤ ☐ 5~6/ week

⑥ ☐ 1/day

⑦ ☐ 2/day

⑧ ☐ ≥ 3/ day

**38b. Each time you ate these fruit, what is your serving size?**

(1 portion = 50 g = 1 Liang)

① ☐ < 1 Liang

② ☐ 1 Liang

③ ☐ 2 ~ 3 Liangs

④ ☐ ≥ 4 Liangs

**39a. In the past 7 days, how often did you eat walnuts?**

① ☐ Never

② ☐ Did not eat in the past 7 days

③ ☐ 1~2 / week

④ ☐ 3~4/ week

⑤ ☐ 5~6/ week

⑥ ☐ 1/day

⑦ ☐ 2/day

⑧ ☐ ≥ 3/ day

**39b. Each time you ate walnuts, what is your serving size?**

(1 portion = 50 g = 1 Liang)

① ☐ < 1 Liang

② ☐ 1 ~ 2 Liangs

③ ☐ 3 ~ 4 Liangs

④ ☐ ≥ 5 Liangs

**40a. In the past 7 days, how often did you eat peanuts?**

① ☐ Never

② ☐ Did not eat in the past 7 days

③ ☐ 1~2 / week

④ ☐ 3~4/ week

⑤ ☐ 5~6/ week

⑥ ☐ 1/day

⑦ ☐ 2/day

⑧ ☐ ≥ 3/ day

**40b. Each time you ate peanut, what is your serving size?**

(1 portion = 50 g = 1 Liang)

① ☐ < 1 Liang

② ☐ 1 ~ 2 Liangs

③ ☐ 3 ~ 4 Liangs

④ ☐ ≥ 5 Liangs

**41a. In the past 7 days, how often did you eat other nuts? e.g. almond, pistachio nuts and cashew etc.**

- ① ☐ Never  
② ☐ Did not eat in the past 7 days  
③ ☐ 1~2 / week  
④ ☐ 3~4/ week  
⑤ ☐ 5~6/ week  
⑥ ☐ 1/day  
⑦ ☐ 2/day  
⑧ ☐  $\geq 3$ / day

**41b. Each time you ate peanut, what is your serving size?**

(1 portion = 50 g = 1 Liang)

- ① ☐  $< 1$  Liang  
② ☐ 1 ~ 2 Liangs  
③ ☐ 3 ~ 4 Liangs  
④ ☐  $\geq 5$  Liangs

**42a. In the past 7 days, how often did you use soy sauce, either for cooking or as a side sauce?**

- ① ☐ Never  
② ☐ Did not eat in the past 7 days  
③ ☐ 1~2 / week  
④ ☐ 3~4/ week  
⑤ ☐ 5~6/ week  
⑥ ☐ 1/day  
⑦ ☐ 2/day  
⑧ ☐  $\geq 3$ / day

**42b. Could you tell me which of the following best describe the amount of your soy sauce consumption?**

- ① ☐ Very little  
② ☐ A little  
③ ☐ Median  
④ ☐ A bit more  
⑤ ☐ Quite a lot

**43a. Which type of oil/fat do you usually use in cooking?**

- ① ☐ Never  
② ☐ Peanut oil  
③ ☐ Corn oil  
④ ☐ Other vegetable oil\*  
⑤ ☐ Animal fat

\*e.g, canola, olive, sunflower, rapeseed oil

**43b. Could you tell me which of the following best describe the amount of your oil consumption?**

- ① ☐ Very little  
② ☐ A little  
③ ☐ Median  
④ ☐ A bit more  
⑤ ☐ Quite a lot

**44. Could you tell me how many glasses of liquid do you usually have per day? Please count water, tea, soup, milk, soy drinks, coffee and juice etc.**

(1 glass = 250 ml) *Please show subjects the sample glass!*

- ① ☐  $< 1$   
② ☐ 1~2  
③ ☐ 3~5  
④ ☐ 6~8  
⑤ ☐ 8~10  
⑥ ☐  $\geq 10$

**45a. In the past 7 days, how often did you have soy drinks?**

- ① ☐ Never  
② ☐ Did not eat in the past 7 days  
③ ☐ 1~2 / week  
④ ☐ 3~4/ week  
⑤ ☐ 5~6/ week  
⑥ ☐ 1/day  
⑦ ☐ 2/day  
⑧ ☐  $\geq 3$ / day

**45b. Each time you had soy drinks, what is your serving size?**

(1 glass = 250 ml) *Please show subjects the sample glass!*

① ☐ < 1

② ☐ 1~2

③ ☐ 3~5

④ ☐ 6~8

⑤ ☐ 8~10

⑥ ☐ ≥ 10

**46a. Which type of milk do you usually consume?**

① ☐ Never

② ☐ Whole milk

③ ☐ Condensed milk

④ ☐ Skimmed milk

⑤ ☐ Low-fat milk

**46b. In the past 7 days, how often did you drink milk?**

① ☐ < 1/ week

② ☐ 1~2/ week

③ ☐ 3~4/ week

④ ☐ 1/day

⑤ ☐ 2/day

⑥ ☐ ≥ 3/ day

**46c. Each time you drank milk, how many glasses did you have? DO NOT count those made from milk powder!** (1 glass = 250 ml) *Please show subjects the sample glass!*

① ☐ < 1

② ☐ 1~2

③ ☐ 3~5

④ ☐ 6~8

⑤ ☐ 8~10

⑥ ☐ ≥ 10

**47a. In the past 7 days, how often did you have yogurt?**

① ☐ Never

② ☐ Did not eat in the past 7 days

③ ☐ 1~2 / week

④ ☐ 3~4/ week

⑤ ☐ 5~6/ week

⑥ ☐ 1/day

⑦ ☐ 2/day

⑧ ☐ ≥ 3/ day

**47b. Each time you ate yogurt, what is your serving size?**

(1 cup = 150 g) *Please show subjects the sample yogurt!*

① ☐ < 1

② ☐ 1 ~ 2

③ ☐ 3 ~ 5

④ ☐ 6 ~ 8

⑤ ☐ > 8

**48a. In the past 7 days, how often did you have cheese?**

① ☐ Never → *The end*

② ☐ Did not eat in the past 7 days → *The end*

③ ☐ 1~2 / week

④ ☐ 3~4/ week

⑤ ☐ 5~6/ week

⑥ ☐ 1/day

⑦ ☐ 2/day

⑧ ☐ ≥ 3/ day

**48b. Each time you ate cheese, what is your serving size?**

(1 piece = 20 g)

① ☐ < 1

② ☐ 1 ~ 2

③ ☐ 3 ~ 5

④ ☐ 6 ~ 8

⑤ ☐ > 8

## Supplementary Material 2

### Blood analysis

All organic solvents used were analytical grade. Ultrapure water (resistivity  $\geq 18$  M/cm) was prepared using a Milli-Q system (Millipore Co., Millford, MA, USA). Supelco® 37 component FAME mixture (No. CRM47885), nonadecanoic acid (No. 72332), methyl nonadecanoate (No. 74208), trans-lutein (No. 07168), trans-zeaxanthin (No. 14681), lycopene (No. 75051), trans- $\beta$ -carotene (No. 22040) and trans- $\beta$ -Apo-8'-carotenal (No. 10810) were all obtained from Sigma-Aldrich Co. (St. Louis, MO, USA).

### *Plasma fatty acids analysis*

Plasma fatty acids were extracted and quantified using gas chromatography mass spectrometry (GC-MS) method as described by Quehenberger et al. with modification [13]. Briefly, the plasma samples were thawed on ice and centrifuged at  $3000 \times g$  for 5 min at  $4^{\circ}\text{C}$  to remove the denatured proteins. For each sample, 200  $\mu\text{L}$  of plasma was diluted with phosphate-buffered saline solution (pH 7.4) and methanol. Nonadecanoic acid (C19:0) (1  $\mu\text{g}/\mu\text{L}$  in dichloromethane) was also added to the sample as an internal standard. Alkaline hydrolysis using 1M potassium hydroxide in methanol was performed to release the esterified fatty acids. The total fatty acids were collected by liquid-liquid extraction using isooctane. After the evaporation of solvent, derivatization using boron tetrafluoride was immediately carried out at  $60^{\circ}\text{C}$ . The fatty acid methyl esters formed during the derivatization process were extracted twice with hexane:diethyl ether (8:2 v/v), then dried completely at  $37^{\circ}\text{C}$  under a stream of nitrogen. The samples were re-suspended in isooctane and analysed immediately.

The derivatized samples were analysed by an Agilent 5977A mass selective detector interfaced with an Agilent 7890B gas chromatograph, equipped with an automatic sampler and a computer workstation. The injection port and GC-MS interface were kept at  $240$  and  $250^{\circ}\text{C}$ , respectively. The mass spectrometer was used in the negative electrical ionization (NEI) mode. Separations were carried out on a SP®-2560 capillary column ( $100 \text{ m} \times 0.25 \text{ mm}$ ,  $d_f 0.20 \mu\text{m}$ , Sigma-Aldrich, USA). Helium was the carrier gas with a flow rate of  $1 \text{ ml/min}$ . The derivatized samples ( $1 \mu\text{l}$ ) were injected into the GC injection port with a split ratio 1:100. The column temperature was maintained at  $140^{\circ}\text{C}$  for 5 min, then increased to  $180^{\circ}\text{C}$  at  $8^{\circ}\text{C/min}$ , and then raised to  $210^{\circ}\text{C}$  at  $4^{\circ}\text{C/min}$ , and further increased to  $250^{\circ}\text{C}$  at  $20^{\circ}\text{C/min}$ , then held at  $250^{\circ}\text{C}$  for 10 min. Selected ion monitoring (SIM) and full scan mode were performed to monitor the fatty acid methyl ester ions. Quantitation was achieved by relating the peak area of the individual fatty acid methyl ester with the C19:0 internal standard peak. Calibration curves

were set up over a concentration range of 2 – 400  $\mu\text{g/mL}$  with 37 Component FAME mix. Each curve point was determined in triplicate and the regression coefficient ranged between 0.988 – 0.997.

#### *Plasma carotenoids analysis*

Carotenoids in the plasma samples were extracted and quantified using liquid chromatography with diode array detector (LC-DAD) method as described by Karppi et al. with modification [14]. Briefly, the plasma samples were thawed on ice, in which 200  $\mu\text{L}$  aliquot was transferred into an amber microcentrifuge tube and diluted with MilliQ water and ethanol-butylated hydroxytoluene (BHT, 0.01% in ethanol) containing the internal standard  $\beta$ -Apo-8-carotenal. Plasma carotenoids were collected by liquid-liquid extraction with hexane-BHT (0.01% BHT in hexane). The samples were then centrifuged at  $1500 \times g$  for 5 min at  $4^\circ\text{C}$  and frozen at  $-80^\circ\text{C}$  to solidify the lower aqueous layer. The supernatant was transferred into a new amber auto-sampler vial, then dried under a stream of nitrogen at  $37^\circ\text{C}$  until complete dryness. The dried sample was reconstituted in the mobile phase, transferred to insert vials, and analysed immediately. The LC-DAD system consisting of 1260 Infinity LC system (Agilent, USA) with a  $\text{C}_{18}$  column ( $250 \times 4.6 \text{ mm}$ ,  $5.0 \mu\text{m}$  particle size, ACE, UK) maintained at  $30^\circ\text{C}$  was used. The isocratic mobile phase consisted of a mixture of acetonitrile–methanol–chloroform (60:25:15, v/v/v). The flow rate was set to 1 mL/min and the injection volume was 50  $\mu\text{L}$ . The total running time was 15 min. Carotenoids and internal standard  $\beta$ -Apo-8-carotenal were monitored at 454 nm. Quantitation was achieved by relating the peak area of the individual carotenoid with the internal standard peak. Calibration curves were set up over a concentration range of 0.01 – 10 mg/L with the standard cocktail. Each curve point was determined in triplicate and the regression coefficient ranged between 0.995 – 0.998. The carotenoids that were analyzed included beta-carotene, lycopene, and combined lutein with zeaxanthin (using the LC-DAD system, it was not possible to achieve a full separation of zeaxanthin and lutein, thus the two isomers were analyzed together).

**Table 1.** List of fatty acids analyzed in plasma by gas-chromatography/mass spectrometry.

| <b>Saturated fatty acids (SFAs)</b>               |                                    |
|---------------------------------------------------|------------------------------------|
| C14:0                                             | Myristic acid                      |
| C15:0                                             | Pentadecylic acid                  |
| C16:0                                             | Palmitic acid                      |
| C17:0                                             | Margaric acid                      |
| C18:0                                             | Stearic acid                       |
| C20:0                                             | Arachidic acid                     |
| <b>Monounsaturated fatty acids (MUFAs)</b>        |                                    |
| C14:1n9                                           | Myristoleic acid                   |
| C15:1n10                                          | Pentadecenoic acid                 |
| C16:1n9                                           | Palmitoleic acid                   |
| C17:1n10                                          | Heptadecenoic acid                 |
| C18:1n9                                           | Oleic acid                         |
| C20:1n9                                           | Gondoic acid                       |
| C22:1n9                                           | Erucic acid                        |
| <b>Omega-6 Polyunsaturated fatty acids (PUFA)</b> |                                    |
| C18:2n6                                           | Linoleic acid (LA)                 |
| C18:3n6                                           | Gamma-linolenic acid (GLA)         |
| C20:2n6                                           | Eicosadienoic acid (EDA)           |
| C20:3n6                                           | Dihomo-gamma-linolenic acid (DGLA) |
| C20:4n6                                           | Arachidonic acid (AA)              |
| C22:4n6                                           | Adrenic acid (AdA)                 |
| <b>Omega-3 Polyunsaturated fatty acids (PUFA)</b> |                                    |
| C18:3n3                                           | Alpha-linolenic acid (ALA)         |
| C20:3n3                                           | Eicosatrienoic acid (ETE)          |
| C20:5n3                                           | Eicosapentaenoic acid (EPA)        |
| C22:5n3                                           | Docosapentaenoic acid (DPA)        |
| C22:6n3                                           | Docosahexaenoic acid (DHA)         |
